# Supplementary material
Source: publisher figshare collection journal article supplement (https://karger.figshare.com/articles/dataset/_/16782361)
Supplement: Supplementary file 1 [file 1]

## **Supplementary Material**

### **Exceptionally steep brain-body evolutionary allometry underlies the unique encephalization of Osteoglossiformes**

**Author** : Masahito Tsuboi

**Journal** : Brain, Behavior and Evolution

### Sources for Silhouette images used in Figure 1-3

|                   |                                                                         |
|-------------------|-------------------------------------------------------------------------|
| Anguilliformes    | : Steven Traver (phylopic.org)                                          |
| Beryciformes      | : uncredited (phylopic.org)                                             |
| Gadiformes        | : Milton Tan (phylopic.org)                                             |
| Osteoglossiformes | : Maija Karala (phylopic.org)*                                          |
| Perciformes       | : Milton Tan (phylopic.org)*                                            |
| Scorpaeniformes   | : Harold N. Eyster (phylopic.org) †                                     |
| Syngnathiformes   | : Francis de Laporte de Castelnau and T. Michael Keeseey (phylopic.org) |
| Tetraodontiformes | : uncredited (phylopic.org)                                             |

\*: Link to the license is "<https://creativecommons.org/licenses/by-nc-sa/3.0/>". Colors are changed from original silhouette.

†: Link to the license is "<https://creativecommons.org/licenses/by/3.0/>". Colors are changed from original silhouette.

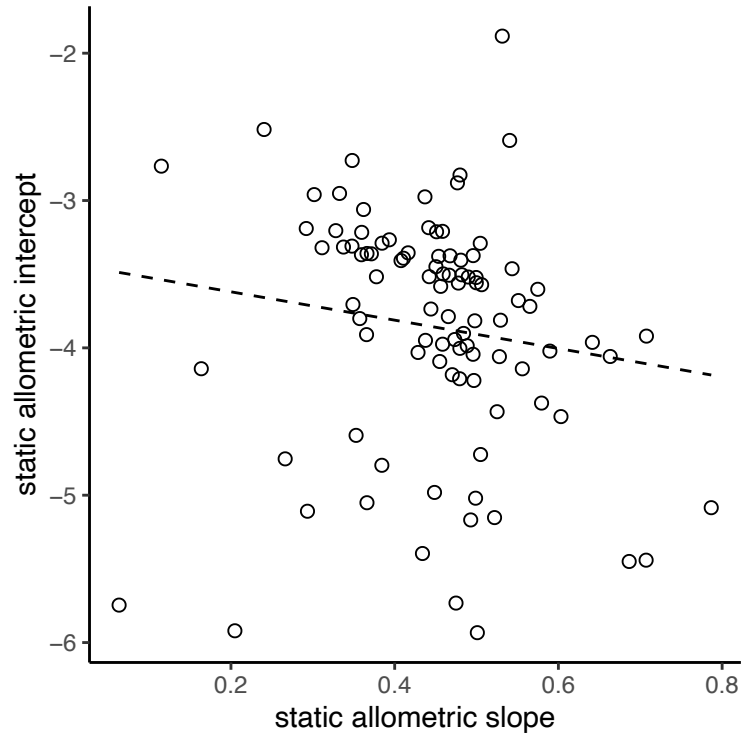

**Figure S1. Relationship between static allometric slopes and intercepts.** Dashed line shows an Ordinary Least Squares regression;  $\text{slope} \pm \text{se} = -0.96 \pm 0.70$ ,  $\text{intercept} \pm \text{se} = -3.43 \pm 0.32$ ,  $r^2 = 2\%$ .

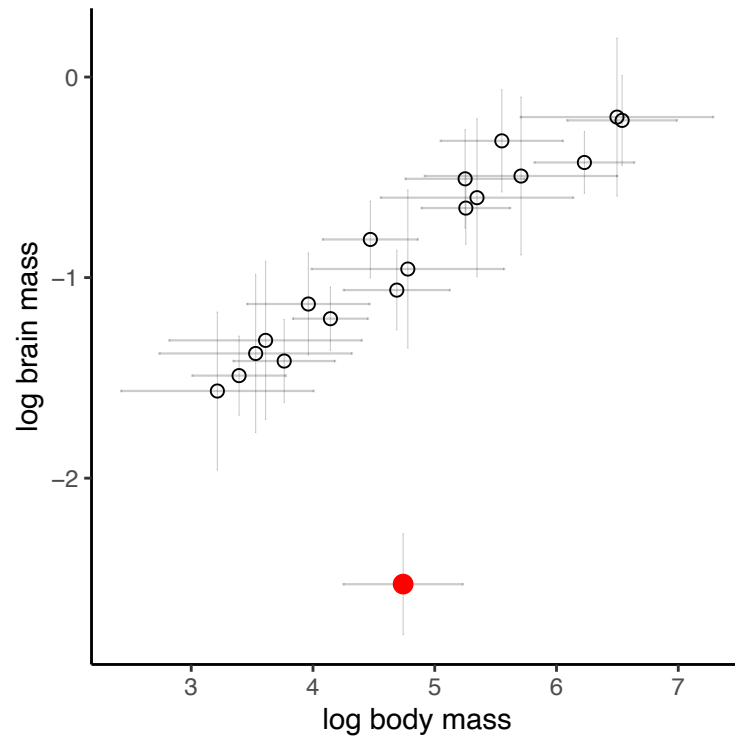

**Figure S2. Relationship between log brain mass and log body mass in Beryciformes.** Circles indicate species means and error bars are standard errors. Red filled circle represents *Anoplogaster cornuta*, which is an obvious outlier and has removed from the analyses reported in the main text.

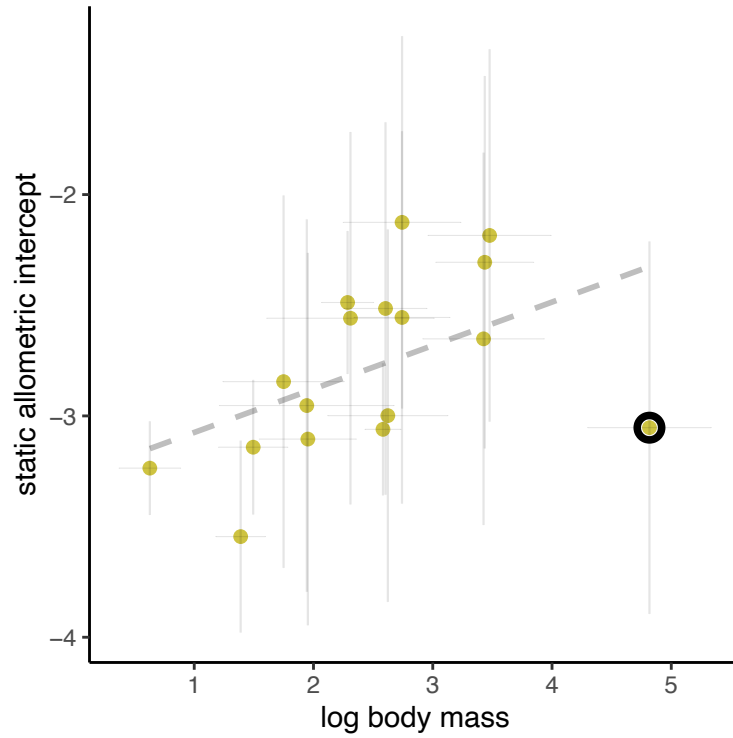

**Figure S3. Relationship between static allometric intercept and log body mass in Osteoglossiformes.** Dashed line shows an Ordinary Least Squares regression; slope $\pm$ se =  $0.20\pm0.09$ , intercept $\pm$ se =  $-3.27\pm0.25$ ,  $r^2 = 23\%$ . Thick black circle shows *Mormyrus tapius*.

**Table S1.** Evolutionary brain-body allometry estimated by direct-effect SLOUCH model in the whole dataset excluding one of 8 orders of Teleost at a time.

| Excluded Order    | $t_{1/2}$                   | $v_{st.}$ | Intercept $\pm$ SE                         | Slope $\pm$ SE                           | $r^2$ |
|-------------------|-----------------------------|-----------|--------------------------------------------|------------------------------------------|-------|
| Anguilliformes    | $\infty$ [3.636- $\infty$ ] | -         | -4.478 $\pm$ 0.377<br>(-4.437 $\pm$ 0.377) | 0.556 $\pm$ 0.009<br>(0.527 $\pm$ 0.010) | 85.1% |
| Beryciformes      | $\infty$ [3.636- $\infty$ ] | -         | -4.483 $\pm$ 0.373<br>(-4.378 $\pm$ 0.373) | 0.554 $\pm$ 0.009<br>(0.526 $\pm$ 0.010) | 85.2% |
| Gadiformes        | $\infty$ [3.510- $\infty$ ] | -         | -4.499 $\pm$ 0.381<br>(-4.387 $\pm$ 0.381) | 0.558 $\pm$ 0.010<br>(0.527 $\pm$ 0.010) | 84.4% |
| Osteoglossiformes | $\infty$ [3.636- $\infty$ ] | -         | -4.523 $\pm$ 0.364<br>(-4.429 $\pm$ 0.364) | 0.548 $\pm$ 0.009<br>(0.523 $\pm$ 0.009) | 85.9% |
| Perciformes       | $\infty$ [1.000- $\infty$ ] | -         | -4.438 $\pm$ 0.426<br>(-4.354 $\pm$ 0.426) | 0.544 $\pm$ 0.015<br>(0.520 $\pm$ 0.016) | 83.3% |
| Scorpaeniformes   | $\infty$ [3.510- $\infty$ ] | -         | -4.502 $\pm$ 0.372<br>(-4.397 $\pm$ 0.372) | 0.559 $\pm$ 0.009<br>(0.530 $\pm$ 0.010) | 85.4% |
| Syngnathiformes   | $\infty$ [3.313- $\infty$ ] | -         | -4.451 $\pm$ 0.351<br>(-4.434 $\pm$ 0.351) | 0.549 $\pm$ 0.009<br>(0.519 $\pm$ 0.010) | 85.3% |
| Tetraodontiformes | $\infty$ [3.367- $\infty$ ] | -         | -4.491 $\pm$ 0.377<br>(-4.387 $\pm$ 0.378) | 0.557 $\pm$ 0.009<br>(0.528 $\pm$ 0.010) | 85.0% |

Note: Phylogenetic half-life ( $t_{1/2}$ , unit: total tree height) and stationary variance ( $v_{st.}$ ) are shown with 2 maximum-likelihood support range from the maximum likelihood estimate. Estimates within parenthesis indicate parameters estimated without correcting for measurement errors. Stationary variance ( $v_{st.}$ ) is not shown in models where the best estimates of phylogenetic half-lives are infinity because stationary phases are never reached in such cases.

**Table S2.** Phylogenetic associations among brain mass, body mass, static slope and static intercept in the full static data.

| Response                   | Predictor          | $t_{1/2}$                   | $v_{st.}$ | Intercept ( $\theta$ ) | Slope             | $r^2$ | AICc |
|----------------------------|--------------------|-----------------------------|-----------|------------------------|-------------------|-------|------|
| (full static data, n = 87) |                    |                             |           |                        |                   |       |      |
| log (brain mass)           | log (body mass)    | $\infty$ [1.242- $\infty$ ] | -         | $-4.185 \pm 0.293$     | $0.545 \pm 0.023$ | 86.0% | 48.1 |
| log (brain mass)           | log (body mass)    | $\infty$ [1.242- $\infty$ ] | -         | $-4.792 \pm 0.286$     | $0.561 \pm 0.023$ | 86.7% | 45.7 |
|                            | + static slope     |                             |           |                        | $1.220 \pm 0.086$ |       |      |
| log (brain mass)           | log (body mass)    | $\infty$ [0.968- $\infty$ ] | -         | $-1.942 \pm 0.372$     | $0.479 \pm 0.026$ | 90.0% | 26.0 |
|                            | + static intercept |                             |           |                        | $0.538 \pm 0.065$ |       |      |
| log (brain mass)           | log (body mass)    | $\infty$ [1.242- $\infty$ ] | -         | $-1.436 \pm 0.316$     | $0.446 \pm 0.023$ | 94.9% | 2.2  |
|                            | + static intercept |                             |           |                        | $1.012 \pm 0.063$ |       |      |
|                            | + static slope     |                             |           |                        | $3.071 \pm 0.096$ |       |      |

Note: Phylogenetic half-life ( $t_{1/2}$ , unit: total tree height) and stationary variance ( $v_{st.}$ ) are presented with lower - upper 2 maximum-likelihood units support interval and intercept ( $\theta$ ) and slope are presented with standard errors. Stationary variance ( $v_{st.}$ ) is not shown in models where the best estimates of phylogenetic half-lives are infinity because stationary phases are never reached in such cases.

**Table S3** Static brain-body allometry of 11 species of Osteoglossiformes

| Taxa                            | n  | Intercept $\pm$ SE | Slope $\pm$ SE  | $r^2$ |
|---------------------------------|----|--------------------|-----------------|-------|
| <i>Brienomyrus brachyistius</i> | 12 | -3.06 $\pm$ 0.19   | 0.36 $\pm$ 0.07 | 70.3% |
| <i>Chitala ornata</i>           | 6  | -3.14 $\pm$ 0.07   | 0.63 $\pm$ 0.05 | 98.0% |
| <i>Gnathonemus longibarbis</i>  | 7  | -2.64 $\pm$ 0.14   | 0.63 $\pm$ 0.04 | 98.4% |
| <i>Gnathonemus petersii</i>     | 9  | -2.49 $\pm$ 0.18   | 0.54 $\pm$ 0.08 | 86.2% |
| <i>Marcusenius victoriae</i>    | 11 | -2.59 $\pm$ 0.04   | 0.54 $\pm$ 0.03 | 98.0% |
| <i>Mormyrus kannume</i>         | 10 | -1.88 $\pm$ 0.96   | 0.53 $\pm$ 0.17 | 53.8% |
| <i>Pantodon buchholzi</i>       | 11 | -3.99 $\pm$ 0.04   | 0.49 $\pm$ 0.04 | 93.4% |
| <i>Paramormyrops</i> sp.        | 8  | -2.60 $\pm$ 0.54   | 0.41 $\pm$ 0.18 | 45.6% |
| <i>Petrocephalus catostoma</i>  | 9  | -3.24 $\pm$ 0.04   | 0.37 $\pm$ 0.04 | 91.0% |
| <i>Pollimyrus adspersus</i>     | 7  | -3.55 $\pm$ 0.28   | 0.76 $\pm$ 0.21 | 73.2% |
| <i>Xenomystes nigri</i>         | 15 | -3.46 $\pm$ 0.05   | 0.54 $\pm$ 0.03 | 95.6% |
